# Supplementary material for: Visual Salience and Orthographic Word Processing in Reading and Recognition: A Signal Detection Approach
Source: Research Square preprint supplement (doi:10.21203/rs.3.rs-7292889/v1), 2025-08-21
Supplement: Supplementary file 1 [file 9ffe9824a2ff12a94f19aa52.docx]

**Supplementary materials for**

**Visual Salience and Orthographic Word Processing in Reading and Recognition: A Signal Detection Approach**

**Table 1**

*Series of words used for display and recognition in the task*

| **Category 1** | **Category 2** | **Category 3** | **Category 4** | **Category 5** | **Category 6** |
| --- | --- | --- | --- | --- | --- |
| baby | snog | time | cion | ibke | jupm |
| home | book | work | ntoe | iknd | lefa |
| star | fsih | moon | jial | rtee | hari |
| bird | mlik | rain | ftae | ahnd | loev |
| park | wnid | road | fial | agte | bleu |
| smile | misuc | happy | geret | rbave | swete |
| dance | migac | story | diarn | paple | tigre |
| water | etarh | brain | senct | lfame | chari |
| horse | qeiut | ocean | garte | atble | beahc |
| cloud | rvier | latch | lhgit | apnda | toats |
| friend | smiple | gentle | palent | lfower | sereen |
| breeze | heonst | beauty | frolal | naswer | guitra |
| jungle | lptaop | orange | gurond | aprrot | castel |
| candle | mloedy | rocket | btotle | amrvel | forets |
| shadow | tkciet | wallet | tbealt | eyllow | wisdmo |
| whisper | lublaly | inspire | raniobw | miagine | curiosu |
| mystery | haromrny | genuine | berathe | rfeedom | ballono |
| eloquent | viarbnt | bicycle | folosih | ojurney | mysteyr |
| country | paisosn | weather | crtuain | idamond | thundre |
| sunshine | senreade | treasure | dleictae | edlicate | remembre |
| intrigue | perocius | twilight | monutian | lbossom | laughtre |
